# Supplementary material for: Br-containing alkyl ammonium salt-enabled scalable fabrication of high-quality perovskite films for efficient and stable perovskite modules
Source: Royal Society of Chemistry journal article supplement (doi:10.1039/c9ta09101g), 2019-01-01
Supplement: c9ta09101g1.pdf [file c9ta09101g1.pdf]

## Supporting Information

### **Br-containing alkyl ammonium salt-enabled scalable fabrication of high-quality perovskite films for efficient and stable perovskite modules**

*Zhongyuan Xu,<sup>a</sup> Ruihao Chen,<sup>a</sup> Yazhuo Wu,<sup>a</sup> Ruiqin He,<sup>a</sup> Jun Yin,<sup>\*,a</sup> Wei Lin,<sup>a</sup> Binghui Wu,<sup>a</sup> Jing Li,<sup>\*,a</sup> Nanfeng Zheng<sup>\*,b</sup>*

<sup>a</sup> OSED, Jiujiang Research Institute, Department of Physics / Pen-Tung Sah Institute of Micro-Nano Science and Technology, Xiamen University, Xiamen 361005, China

<sup>b</sup> State Key Laboratory for Physical Chemistry of Solid Surfaces, Collaborative Innovation Center of Chemistry for Energy Materials, Department of Chemistry, College of Chemistry and Chemical Engineering, Xiamen University, Xiamen 361005, China

\*Email: [jyin@xmu.edu.cn](mailto:jyin@xmu.edu.cn), [lijing@xmu.edu.cn](mailto:lijing@xmu.edu.cn) or [nfzheng@xmu.edu.cn](mailto:nfzheng@xmu.edu.cn)

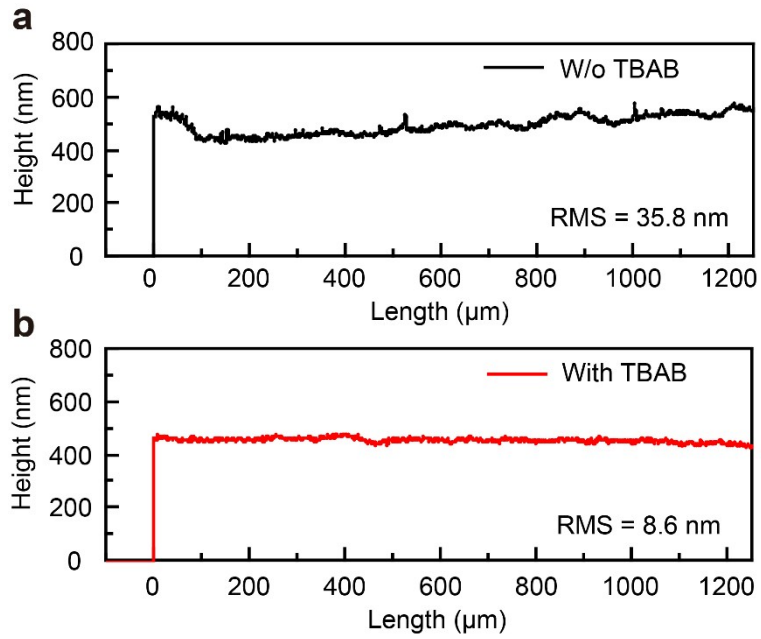

**Figure S1.** Surface profile measurement for the fabricated perovskite films (a) without and (b) with TBAB doping for a comparison. The obtained root-mean-square (RMS) roughness for the samples was 35.8 nm and 8.6 nm, respectively.

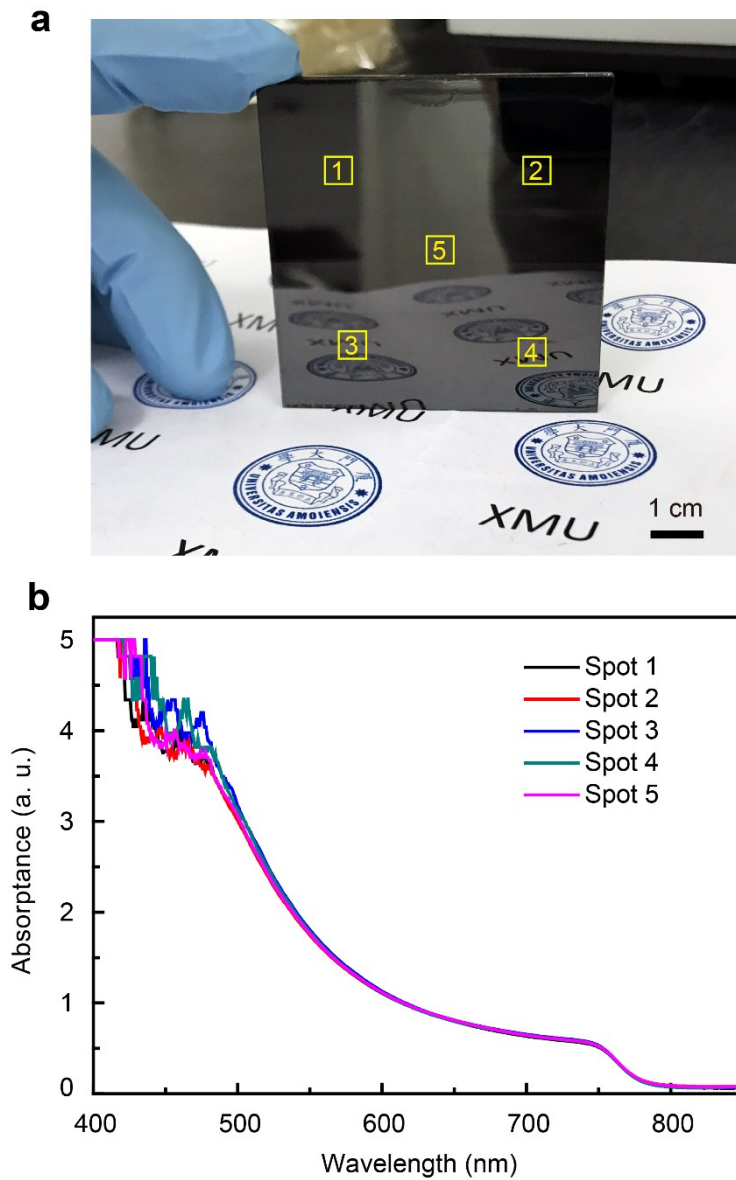

**Figure S2.** (a) Blade-coated large area (36 cm<sup>2</sup>) perovskite film and (b) the corresponding absorption spectra for the selected five different spots within the film. The measured aperture size for each spots was about 0.5 cm<sup>2</sup>.

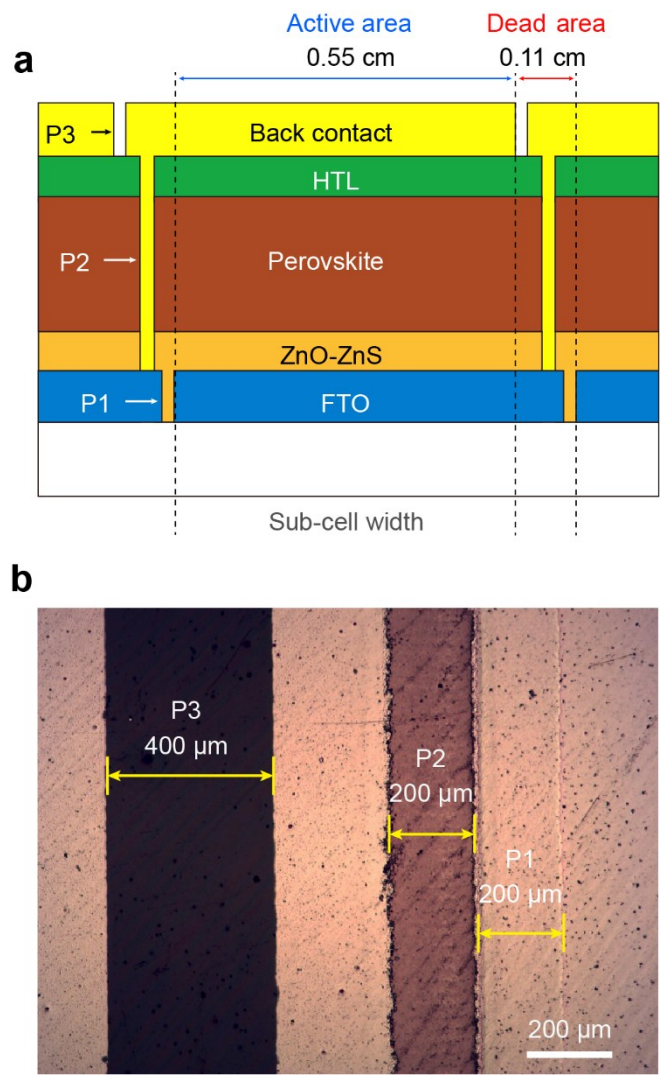

**Figure S3.** (a) Schematical illustration of the module structure; (b) Microscope photo of the module shown the P1-P2-P3 parameters. In this work, the module contains four sub-cells and the width (0.55 cm) for each cell was precisely determined by the laser scribing with designed parameters, including the P1-P2-P3 wells. While for the length of the sub-cell, it was determined by the width of the top Au electrodes which were deposited using a metal mask and was measured to be  $\sim 3.62$  cm. Therefore, the total active area for the  $4 \times 4$  cm<sup>2</sup> sized mini-module was calculated to be  $3.62 \text{ cm} \times 0.55 \text{ cm} \times 4 \approx 8.0 \text{ cm}^2$ .

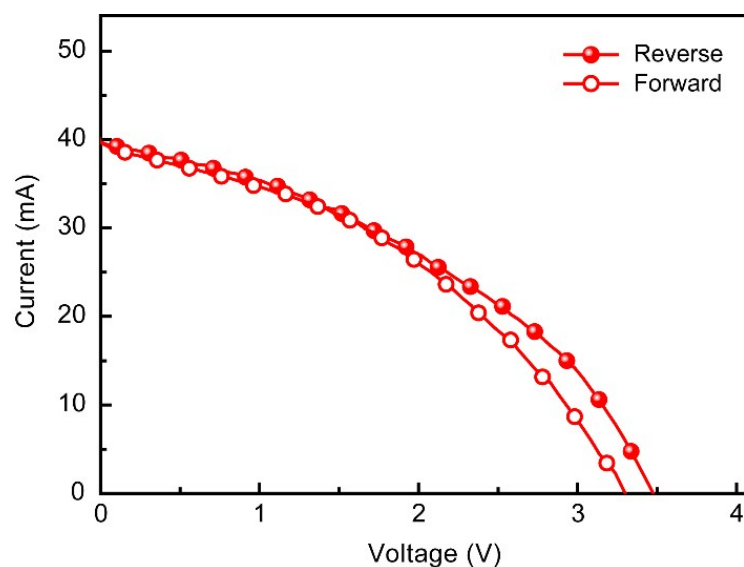

**Figure S4.** Current-voltage ( $J$ - $V$ ) curves of the best performed module based on the perovskite film without TBAB additive doping. The module size was 16-cm<sup>2</sup> and measured from reverse and forward scan under AM 1.5G condition (100 mW cm<sup>-2</sup>).

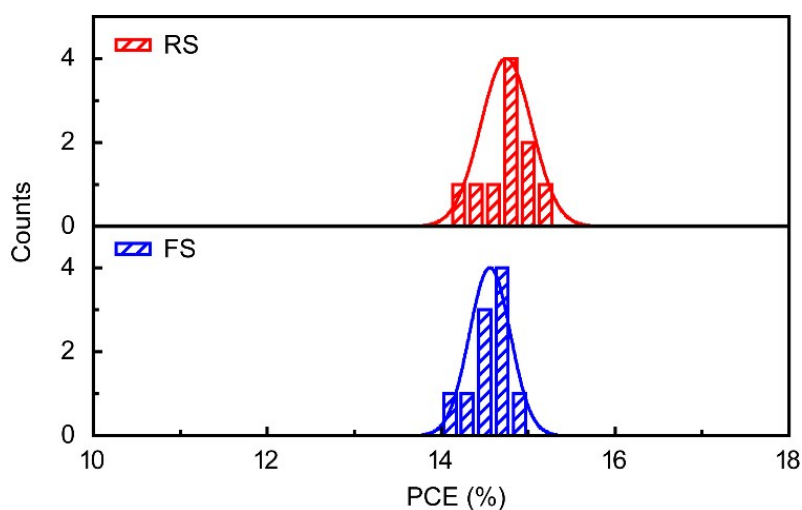

**Figure S5.** Statics of the PCE values for ten perovskite PSC modules using the reverse scan (RS) and forward scan (FS). The average PCE values were  $14.75 \pm 0.29\%$  and  $14.56 \pm 0.24\%$  for reverse and forward scans, respectively.

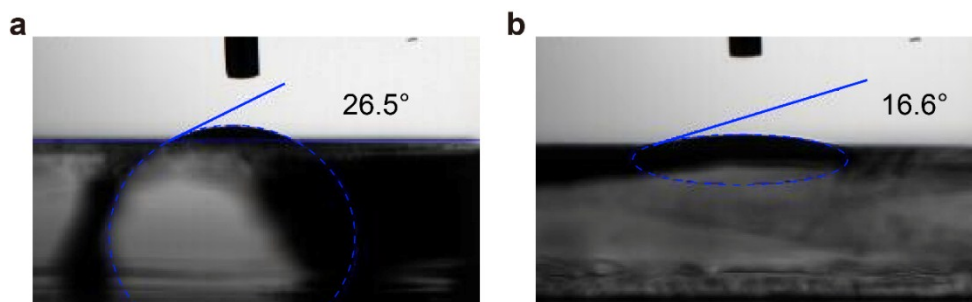

**Figure S6.** Contact angle measurement of the perovskite precursor (a) without and (b) with TBAB additive on the ZnO-ZnS/FTO substrates. The fitted contact angles were  $26.5^\circ$  and  $16.6^\circ$  for the two samples, respectively.

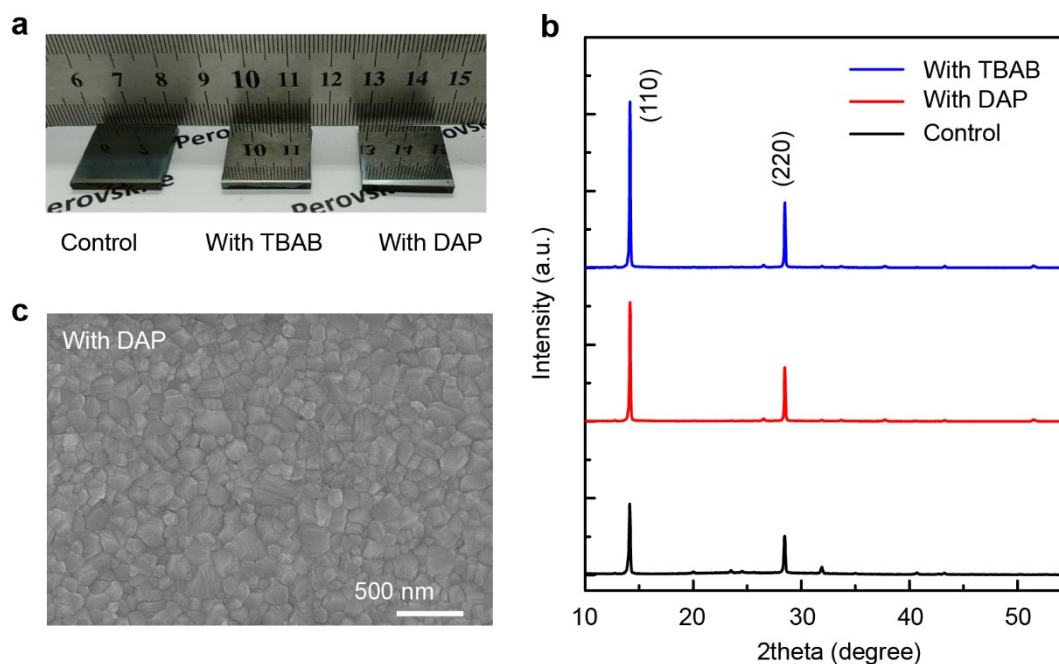

**Figure S7.** (a) Photo images of the blade-coated perovskite films tailored with DAP ( $0.28 \text{ g L}^{-1}$ ) and TBAB ( $0.1 \text{ g L}^{-1}$ ), comparing to the control one; (b) the corresponding XRD patterns of the films shown in (a) for a comparison; (c) SEM images of the prepared films tailored by DAP. The results well indicated that the neutral amine surfactant (DAP) also can improve the surface uniformity (mirror-like surface) and the crystallinity as that using the TBAB, comparing to the control film. However, the grain size of the perovskite has not been increased, which shows the similar results as that reported in the literature,<sup>1</sup> inferring the different tailoring mechanism of TBAB.

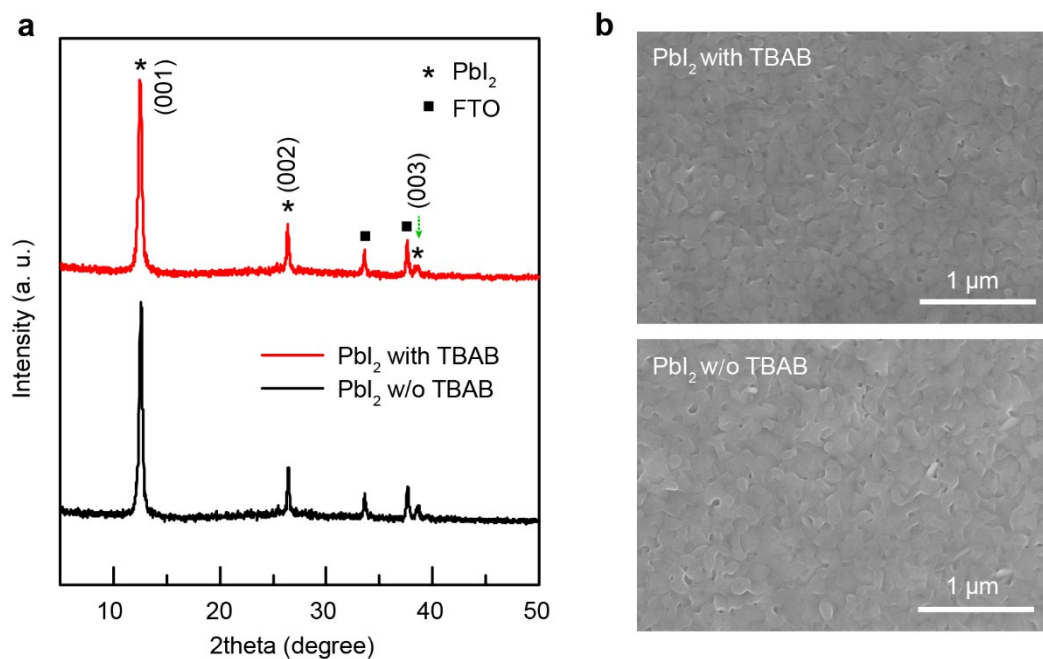

**Figure S8.** (a) XRD patterns of the blade-coated PbI<sub>2</sub> films doped with and without TBAB (0.1 g L<sup>-1</sup>, the same molar ratio used in the fabrication process of perovskite film) for a comparison, and (b) shows the corresponding SEM images. The results show no obvious different in crystallinity and surface morphology for the films, indicating that the doped TBAB is different from the commonly used Lewis basic type additives which have strong coordination effect.<sup>1,2</sup>

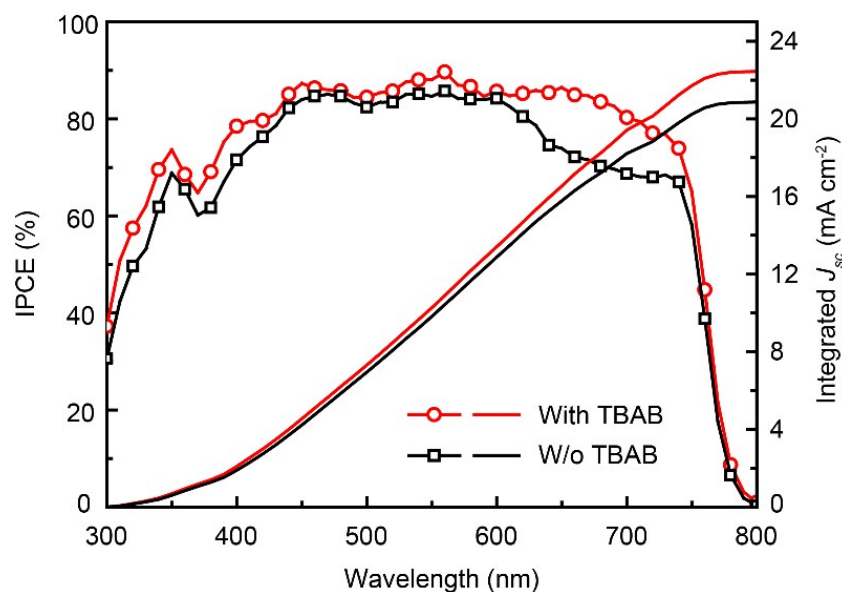

**Figure S9.** IPCE spectra and integrated current density  $J_{sc}$  for the best-performing cells in Figure 4a, which were fabricated using the perovskite films tailored with or without TBAB. The integrated  $J_{sc}$  for the cells with and without TBAB doping was  $22.45 \text{ mA cm}^{-2}$  and  $20.87 \text{ mA cm}^{-2}$ , respectively, which matched well with the  $J$ - $V$  measurement.

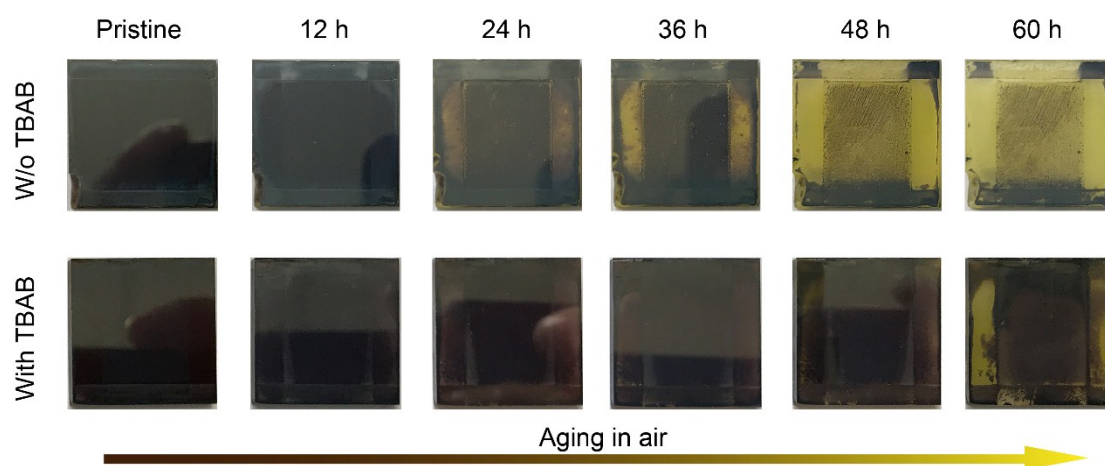

**Figure S10.** Color evolution of the perovskite films aging in open air under the high RH about 85%. The much slower color changing from black to yellow due to the moisture induced decomposition indicates the obviously increased moisture stability for the TBAB doped film with comparison to the control one.



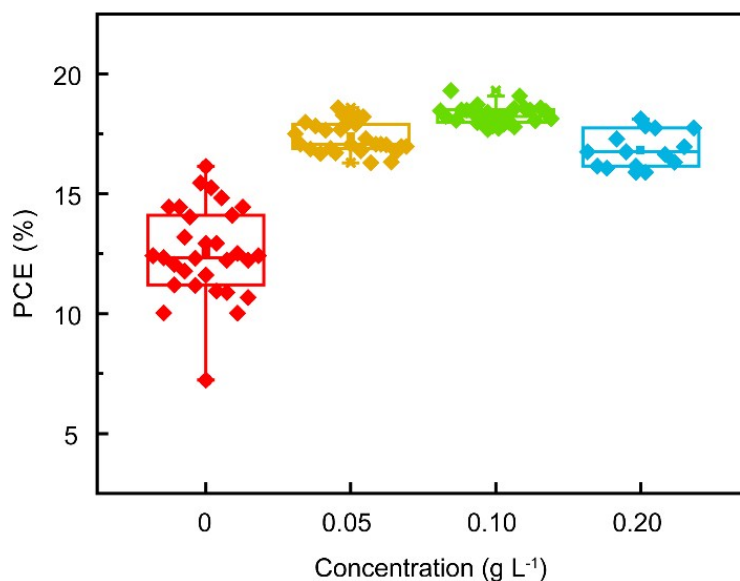

**Figure S11.** PCE metrics for a batch of devices (15 or 30) based the perovskite films with different concentration of TBAB additive: 0, 0.05, 0.10 and 0.20 g L<sup>-1</sup>.

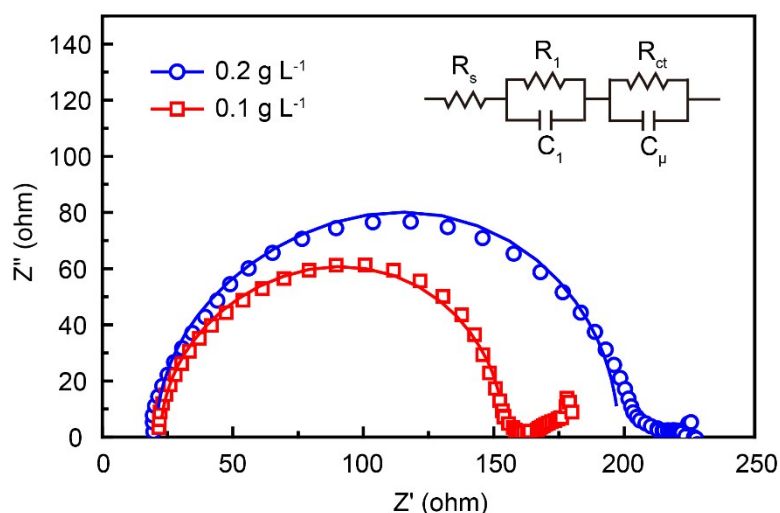

**Figure S12.** (a) Nyquist plots and fitted curves (solid lines) for the PSCs with 0.1 and 0.2 g L<sup>-1</sup> TBAB doping (under 0.8 V bias). The measurement was taken under dark condition and the equivalent circuit employed to fit the spectra was shown in inset.  $R_s$  is the series resistance;  $R_l$  and  $C_l$  represent the hole transport resistance and capacitance through the hole transport material layer; and  $R_{ct}$  corresponds to the charge-transfer-resistance in the perovskite films and interfaces while  $C_\mu$  represents the chemical capacitance.<sup>3-5</sup> The fitted  $R_{ct}$  values were 99.9  $\Omega$  and 134.5  $\Omega$  for the devices based on perovskite film with 0.1 and 0.2 g L<sup>-1</sup> TBAB doping, respectively. The results indicated that additional doping of TBAB would decrease the charge transfer performance.

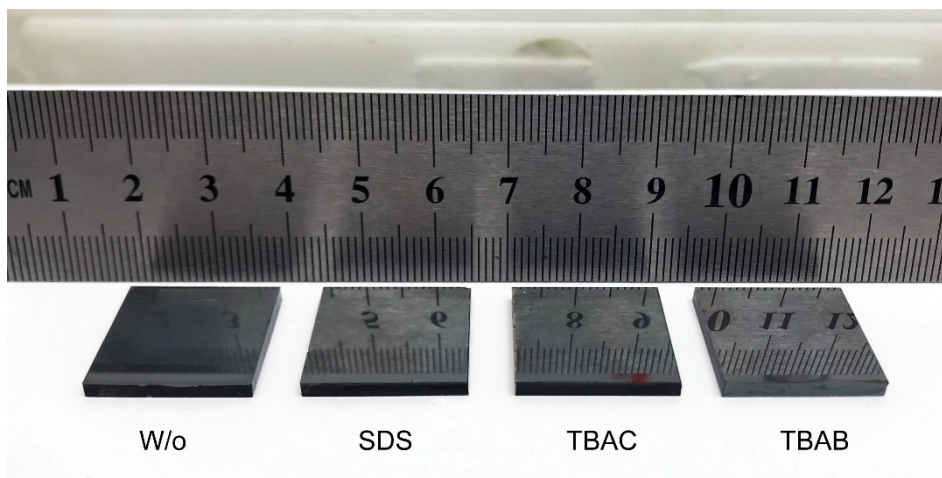

**Figure S13.** Photo images of perovskite films based on the precursor without additive doping or doped with SDS, TBAC and TBAB, respectively.

#### References:

1. W. Q. Wu, Z. Yang, P. N. Rudd, Y. Shao, X. Dai, H. Wei, J. Zhao, Y. Fang, Q. Wang, Y. Liu, Y. Deng, X. Xiao, Y. Feng and J. Huang, *Sci Adv*, 2019, **5**, eaav8925.
2. J.-W. Lee, Z. Dai, C. Lee, H. M. Lee, T.-H. Han, N. De Marco, O. Lin, C. S. Choi, B. Dunn, J. Koh, D. Di Carlo, J. H. Ko, H. D. Maynard and Y. Yang, *J. Am. Chem. Soc.*, 2018, **140**, 6317-6324.
3. H. S. Kim, I. Mora-Sero, V. Gonzalez-Pedro, F. Fabregat-Santiago, E. J. Juarez-Perez, N. G. Park and J. Bisquert, *Nature Commun.*, 2013, **4**, 2242.
4. H. S. Kim, J. W. Lee, N. Yantara, P. P. Boix, S. A. Kulkarni, S. Mhaisalkar, M. Gratzel and N. G. Park, *Nano Lett.*, 2013, **13**, 2412-2417.
5. J. Bisquert, *J. Phys. Chem. B*, 2002, **106**, 325-333.
